# Supplementary material for: Quality assessment of applications for animal trials
Source: Research Square preprint supplement (doi:10.21203/rs.3.rs-8580816/v1), 2026-02-04
Supplement: Supplementary file 1 [file 25e091a387092311d3c04bd5.pdf]

## Appendix A: Database variables

| Variable                                              | Possible answers                                 | Type    |
|-------------------------------------------------------|--------------------------------------------------|---------|
| <b>1 Study design</b>                                 |                                                  |         |
| experimental replication?                             | yes<br>no                                        | nominal |
| number of replications                                | number                                           | metric  |
| strategy of analysis of replications                  | representative<br>pooled<br>(other)              | nominal |
| control group?                                        | yes<br>no<br>(other)                             | nominal |
| experimental unit                                     | single animal<br>litter<br>cage<br>(other)       | nominal |
| <b>2 Sample size</b>                                  |                                                  |         |
| number of experimental units per group                | numbers                                          | metric  |
| number of animals per group                           | numbers                                          | metric  |
| total number of animals                               | number                                           | metric  |
| precision of total number of animals                  | exact<br>fuzzy                                   | ordinal |
| sample size calculation?                              | yes<br>no                                        | nominal |
| power                                                 | number                                           | metric  |
| significance level                                    | number                                           | metric  |
| effect size                                           | number                                           | metric  |
| directionality                                        | one-sided<br>two-sided                           | nominal |
| <b>3 Inclusion and exclusion criteria</b>             |                                                  |         |
| inclusion and exclusion criteria                      | text                                             | string  |
| time of establishment of inclusion/exclusion criteria | a priori<br>a posteriori<br>none used            | nominal |
| <b>4 Randomisation</b>                                |                                                  |         |
| randomisation?                                        | done<br>stated as not done                       | nominal |
| method used to generate randomisation sequence        | text                                             | string  |
| controlling of confounders?                           | strategy described<br>confounders not controlled | nominal |
| <b>5 Blinding/Masking</b>                             |                                                  |         |
| blinding?                                             | blinding done<br>blinding not done               | nominal |
| <b>6 Outcome measures</b>                             |                                                  |         |
| primary outcome(s)                                    | text                                             | string  |
| secondary outcome(s)                                  | text                                             | string  |

| <b>7 Statistical methods</b>             |                                                                                                                                                         |                    |
|------------------------------------------|---------------------------------------------------------------------------------------------------------------------------------------------------------|--------------------|
| methods used named?                      | yes<br>no                                                                                                                                               | nominal            |
| methods used                             | t-Test paired<br>t-Test unpaired<br>ANOVA one way<br>ANOVA two way<br>Kruskal Wallis<br>Mann Whitney U (Willcoxon)<br>chi square<br>log rank<br>(other) | multiple<br>choice |
| adjustment made for multiple comparison? | yes<br>no<br>irrelevant                                                                                                                                 | nominal            |
| requirements discussed?                  | yes<br>no                                                                                                                                               | nominal            |
| limitations discussed?                   | yes<br>no                                                                                                                                               | nominal            |
| software used named?                     | yes<br>no                                                                                                                                               | nominal            |
| software used                            | GraphPad PRISM<br>SPSS<br>SAS<br>R<br>Excel<br>nQuery<br>G-Power<br>GINGER<br>(other)                                                                   | multiple<br>choice |
| <b>8 Experimental animals</b>            |                                                                                                                                                         |                    |
| animal species                           | text                                                                                                                                                    | string             |
| animal strain                            | text                                                                                                                                                    | string             |
| sex                                      | female<br>male<br>whatever<br>(other)                                                                                                                   | nominal            |
| minimum age                              | number                                                                                                                                                  | metric             |
| time unit for minimum age                | days<br>weeks<br>months<br>years                                                                                                                        | ordinal            |
| maximum age                              | number                                                                                                                                                  | metric             |
| time unit for maximum age                | days<br>weeks<br>months<br>years                                                                                                                        | ordinal            |

|                                          |                                                                                 |         |
|------------------------------------------|---------------------------------------------------------------------------------|---------|
| <b>13 Objectives</b>                     |                                                                                 |         |
| primary reasearch question               | text                                                                            | string  |
| type of study                            | confirmatory<br>exploratory<br>setup<br>training<br>not identifiable<br>(other) | nominal |
| <b>15 Housing and husbandry</b>          |                                                                                 |         |
| housing conditions specified?            | yes<br>no                                                                       | nominal |
| <b>16 Animal care and monitoring</b>     |                                                                                 |         |
| steps taken to reduce animal suffering?  | yes<br>no                                                                       | nominal |
| humane endpoints established?            | yes<br>no                                                                       | nominal |
| <b>19 Protocol registration</b>          |                                                                                 |         |
| protocol prepared before study?          | protocol registered<br>protocol not registered<br>no protocol                   | nominal |
| <b>22 Severity of animal suffering</b>   |                                                                                 |         |
| legal categorization of animal suffering | non-recovery<br>severe<br>moderate<br>mild                                      | ordinal |
| <b>23 Biostatistician</b>                |                                                                                 |         |
| statistics institute involved?           | yes<br>no                                                                       | nominal |
| <b>24 Classification</b>                 |                                                                                 |         |
| research field(s)                        | text                                                                            | string  |

Where applicable fields have the option to be “not stated” indicating, that this item was not mentioned in the application at all. The option “(other)” always represents a string input for including values not considered when designing the database.

## Appendix B: Outline of web interface

### 1 Study design

For each experiment, provide brief details of study design including:

- Are there multiple replications of the experiment?  
☐ yes  
☐ no
- If yes, how many replications?  
[---]
- What is the used strategy of analysis for the experimental replication?  
☐ representative  
☐ pooled  
☐ not stated  
☐ other
- if other, provide details:  
[---]
- The groups being compared, including control groups. If no control group is used, the rationale should be stated.  
☐ no control group  
☐ group and control  
☐ other
- if other, provide details:  
[---]
- The experimental unit.  
☐ single animal  
☐ litter  
☐ cage  
☐ other
- if other, provide details:  
[---]

## 2 Sample size

- Specify the exact number of experimental units allocated to each experimental group (enter a space-separated list of numbers).  
  
O not stated
- Specify the exact number of animals allocated to each experimental group (enter a space-separated list of numbers).  
  
O not stated
- Animals used in total.  
  
O not stated
- numeric statement kind  
O exact number  
O fuzzy number  
O not stated

Explain how the sample size is decided. Provide details of any a priori sample size calculation, if done.

- The sample size is determined by calculation.  
O yes  
O no  
O not stated

If yes, then provide the calculation parameters used:

- Power (in percent).  
  
O not stated
- Significance level (in percent).  
  
O not stated
- Effect size (in standard deviations).  
  
O not stated
- Directionality.  
O one-sided  
O two-sided  
O not stated

### 3 Inclusion and exclusion criteria

- Describe the criteria which are used for including and excluding animals (or experimental units) during the experiment, and data points during the analysis. [\_\_\_]  
O not stated
- Specify if these criteria are established a priori. If no criteria are set, state this explicitly.  
O a priori  
O a posteriori  
O no exclusion criteria used  
O not stated  
O other
- if other, provide details:  
[\_\_\_]

### 4 Randomisation

- State whether randomisation is used to allocate experimental units to control and treatment groups.  
O done  
O stated as not done  
O not stated
- Provide the method used to generate the randomisation sequence.  
[\_\_\_]  
O not stated
- Describe the strategy used to minimise potential confounders such as the order of treatments and measurements, or animal/cage location. If confounders are not controlled, state this explicitly.  
O strategy described  
O confounders not controlled  
O strategy not described

### 5 Blinding/Masking

- Who is aware of the group allocation at the different stages of the experiment (during the allocation, the conduct of the experiment, the outcome assessment and the data analysis)?  
O blinding done  
O blinding not done  
O not stated

## 6 Outcome measures

Clearly define all outcome measures assessed (eg, cell death, molecular markers or behavioural changes).

- Primary outcome(s).  
  
☐ not stated
- Secondary outcome(s), if any.  
  
☐ not stated

## 7 Statistical methods

Provide details of the statistical methods used.

- The statistical methods used are named.  
☐ yes  
☐ no
- If yes, which are used:  
☐ t-Test paired  
☐ t-Test unpaired  
☐ ANOVA one way  
☐ ANOVA two way  
☐ Kruskal Wallis  
☐ Mann Whitney U (Willcoxon)  
☐  $\chi^2$  (chi square)  
☐ log rank  
☐ other methods used
- if yes, provide details:
- adjustment made for multiple comparison  
☐ yes  
☐ no  
☐ irrelevant  
☐ not stated
- Were requirements discussed for the used methods?  
☐ yes  
☐ no
- Were limitations discussed of the used method?  
☐ yes  
☐ no

Provide details about the software used.

- The used software is named.  
☐ yes  
☐ no
- If yes, which are used:  
☐ GraphPad PRISM  
☐ SPSS  
☐ SAS  
☐ R  
☐ Excel  
☐ nQuery  
☐ G-Power  
☐ GINGER  
☐ other software mentioned
- if yes, provide details:  
[\_\_\_]

## 8 Experimental animals

Provide species-appropriate details of the animals used, including species, strain and substrain, sex, age or developmental stage and, if relevant, weight.

- Animal species.  
[\_\_\_]  
☐ not stated
- Animal strain.  
[\_\_\_]  
☐ not stated
- Sex.  
☐ female  
☐ male  
☐ whatever  
☐ not stated  
☐ other
- if other, provide details:  
[\_\_\_]
- Minimum age.  
[\_\_\_]  
☐ not stated



- Time unit for minimum age.  
☐ days  
☐ weeks  
☐ months  
☐ years
- Maximum age.  
  
☐ not stated
- Time unit for maximum age.  
☐ days  
☐ weeks  
☐ months  
☐ years

## **ARRIVE Recommended Set**

### **13 Objectives**

Clearly describe the research question, research objectives and, where appropriate, specific hypotheses being tested.

- Primary research question.  
  
☐ not stated
- Type of study.  
☐ confirmatory  
☐ exploratory  
☐ setup  
☐ training  
☐ not identifiable  
☐ not stated  
☐ other
- if other, provide details:

### **15 Housing and husbandry**

Provide details of housing and husbandry conditions, including any environmental enrichment.

- Housing conditions are specified.  
☐ yes  
☐ no

## 16 Animal care and monitoring

Describe any interventions or steps taken in the experimental protocols to reduce pain, suffering and distress.

- Steps are taken to reduce animal suffering.  
☐ yes  
☐ no  
☐ not stated

Describe the humane end points established for the study. If the study does not have humane end points, state this.

- Humane endpoints are established.  
☐ yes  
☐ no  
☐ not stated

## 19 Protocol registration

- Provide a statement indicating whether a protocol (including the research question, key design features and analysis plan) is prepared before the study, and if and where this protocol is registered.  
☐ protocol registered  
☐ protocol not registered  
☐ no protocol  
☐ no statement provided

## Beyond ARRIVE

### 22 Severity of animal suffering

- Categorize the suffering inflicted on animals.  
☐ non-recovery  
☐ severe  
☐ moderate  
☐ mild  
☐ not stated

### 23 Biostatistician

- Is a statistics institute involved?  
☐ yes  
☐ no  
☐ not stated

### 24 Classification

- Research field(s) of the experiment (space-separated list)  
[\_\_\_]

## Appendix C: Definition of Grouped Research Fields

| Research_Institute                                              | Research_Field        |
|-----------------------------------------------------------------|-----------------------|
| IN_Labormedizin                                                 | NON_CLINICAL          |
| IN_Pathologie                                                   | NON_CLINICAL          |
| SO_CCRI_St_Anna_Kinderkrebsforschung                            | RESEARCH_INSTITUTE    |
| SO_CeMM                                                         | RESEARCH_INSTITUTE    |
| SO_Ludwig_Boltzmann_Institute_for_Rare_and_Undiagnosed_Diseases | RESEARCH_INSTITUTE    |
| SO_Max_Perutz_Labs                                              | RESEARCH_INSTITUTE    |
| SO_Vetmeduni_Wien                                               | RESEARCH_INSTITUTE    |
| UK_Allgemeinchirurgie                                           | CLINICAL_SURGICAL     |
| UK_Anaesthesie_Allgemeine_Intensivmedizin_und_Schmerztherapie   | CLINICAL_NON_SURGICAL |
| UK_Anaesthesie_Allgemeine_Intensivmedizin_und_Schmerztherapie   | CLINICAL_NON_SURGICAL |
| ZE_Biomedizinische_Forschung                                    | CLINICAL_NON_SURGICAL |
| UK_Dermatologie                                                 | CLINICAL_SURGICAL     |
| UK_Hals_Nasen_und_Ohrenkrankheiten                              | CLINICAL_SURGICAL     |
| UK_Herzchirurgie                                                | CLINICAL_SURGICAL     |
| UK_Innere_Medizin_I                                             | CLINICAL_INTERNALMED  |
| UK_Innere_Medizin_I ZE_Physiologie_und_Pharmakologie            | CLINICAL_INTERNALMED  |
| UK_Innere_Medizin_II                                            | CLINICAL_INTERNALMED  |
| UK_Innere_Medizin_III                                           | CLINICAL_INTERNALMED  |
| UK_Kinder_und_Jugendheilkunde                                   | CLINICAL_NON_SURGICAL |
| UK_Klinische_Pharmakologie                                      | CLINICAL_NON_SURGICAL |
| UK_Mund_Kiefer_und_Gesichtschirurgie                            | CLINICAL_SURGICAL     |
| UK_Neurologie                                                   | CLINICAL_NON_SURGICAL |
| UK_Notfallmedizin                                               | CLINICAL_NON_SURGICAL |
| UK_Orthopaedie_und_Unfallchirurgie                              | CLINICAL_SURGICAL     |
| UK_Plastische_Rekonstruktive_und_aesthetische_Chirurgie         | CLINICAL_SURGICAL     |
| UK_Radiologie_und_Nuklearmedizin                                | CLINICAL_NON_SURGICAL |
| UK_Radioonkologie                                               | CLINICAL_NON_SURGICAL |
| UK_Thoraxchirurgie                                              | CLINICAL_SURGICAL     |
| UK_Universitaetszahnklinik                                      | CLINICAL_NON_SURGICAL |
| ZE_Anatomie_und_Zellbiologie                                    | NON_CLINICAL          |
| ZE_Biomedizinische_Forschung                                    | RESEARCH_INSTITUTE    |
| ZE_Hirnforschung                                                | RESEARCH_INSTITUTE    |
| ZE_Krebsforschung                                               | RESEARCH_INSTITUTE    |
| ZE_Medizinische_Physik_und_Biomedizinische_Technik              | NON_CLINICAL          |
| ZE_Pathobiochemie_und_Genetik                                   | NON_CLINICAL          |
| ZE_Pathophysiologie_Infektiologie_Immunologie                   | NON_CLINICAL          |
| ZE_Physiologie_und_Pharmakologie                                | NON_CLINICAL          |
